# Supplementary material for: A Nonpeptide Oxytocin Receptor Agonist for a Durable Relief of Inflammatory Pain
Source: PubMed Central journal article supplement (PMC7033278; doi:10.1038/s41598-020-59929-w), 2020-02-20
Supplement: 41598_2020_59929_MOESM1_ESM.pdf [file 41598_2020_59929_MOESM1_ESM.pdf]

## **A Nonpeptide Oxytocin Receptor Agonist for a Durable Relief of Inflammatory Pain**

Louis Hilfiger<sup>1</sup>, Qian Zhao<sup>2</sup>, Damien Kerspern<sup>1</sup>, Perrine Inquimbert<sup>1</sup>, Virginie Andry<sup>1</sup>, Yannick Goumon<sup>1</sup>, Pascal Darbon<sup>1</sup>, Marcel Hibert<sup>2#</sup>, Alexandre Charlet<sup>1#\*</sup>

<sup>1</sup> Centre National de la Recherche Scientifique and University of Strasbourg, UPR3212 Institute of Cellular and Integrative Neurosciences, Strasbourg, France.

<sup>2</sup> Laboratoire d'Innovation Thérapeutique, Faculté de Pharmacie, UMR7200 CNRS/Université de Strasbourg, Illkirch, France.

# Equal senior author.

\* Corresponding author.

### Corresponding Author

Alexandre Charlet, PhD

CNRS UPR3112, INCI

8, Allée du Général Rouvillois

67000 Strasbourg, France

Phone: + 33 (0) 6070 825 06

E-mail: [acharlet@unistra.fr](mailto:acharlet@unistra.fr)

## Supplementary table and figures

| Channel       | Compound       | Concentration | Normalized percentage inhibition (mean, n=2) |
|---------------|----------------|---------------|----------------------------------------------|
| Nav 1.5       | LIT-001        | 5 mM          | 0.7                                          |
|               | Lidocaine      | 100 mM        | 78.0                                         |
| Cav 1.2       | LIT-001        | 5 mM          | -9.3                                         |
|               | Verapamil      | 50 mM         | 57.5                                         |
| KCNQ1/minK    | LIT-001        | 5 mM          | 7.1                                          |
|               | Chromanol 293B | 10 mM         | 51.7                                         |
| hERG          | LIT-001        | 5 mM          | 2.1                                          |
|               | Cisapride      | 0.1 mM        | 35.9                                         |
|               |                |               | Normalized peak current (mean, n=2)          |
| GABA A a1b2g2 | LIT-001        | 5 mM          | 110.7                                        |
|               | Vehicle        | 0.33% DMSO    | 102.6                                        |
|               | Diazepam       | 0.1 mM        | 224.8                                        |
| hnAChR a4b2   | LIT-001        | 5 mM          | 2.7                                          |
|               | Vehicle        | 0.33% DMSO    | 4.5                                          |
|               | Acetylcholine  | 30 mM         | 66.1                                         |

Figure S1

**Figure S1. Inhibition potency of LIT-001 on ion channel blockade.** Normalized percentage inhibition values for each compound assayed on each channel specified below. The compound data was normalized to vehicle control (0% inhibition) and maximal inhibition control (100% inhibition).

**a1** Contralateral hindpaw

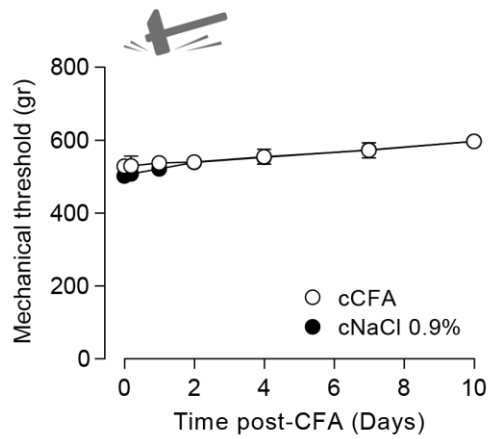

**a2**

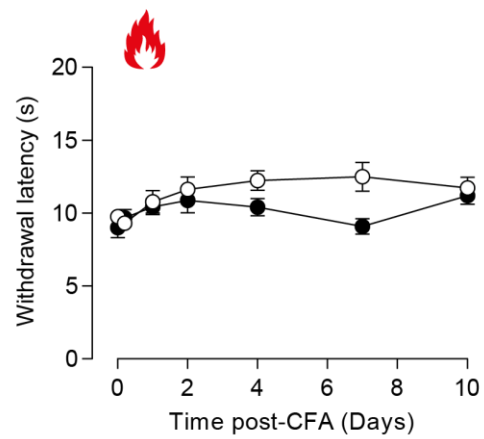

Figure S2

**Figure S2. Ten days' time course of long-term modifications induced by CFA subcutaneous injection – contralateral hindpaw.** (a) Time-course of the CFA-induced mechanical (a1) and thermal heat (a2) hyperalgesia (CFA, n = 14; NaCl, n = 18). Data are expressed as mean  $\pm$  SEM. No statistical significance were detected using two-way ANOVA followed by Tukey multiple comparisons test.

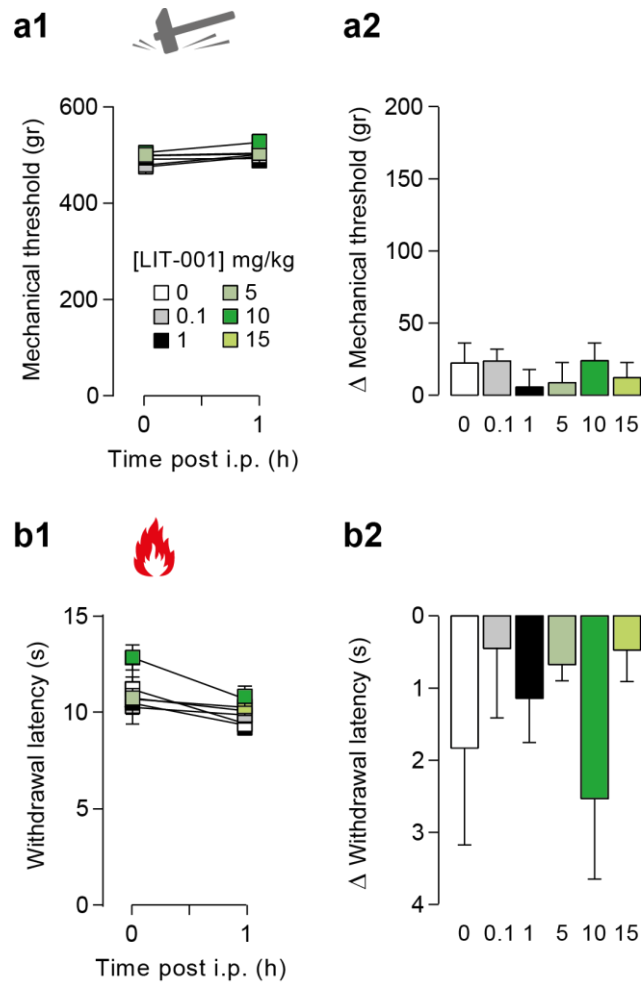

Figure S3

**Figure S3. Dose-response of the analgesic properties of LIT-001 on CFA-induced inflammatory pain model – contralateral hindpaw.** Effects of LIT-001 0.1 (n = 4), 1 (n = 6), 5 (n = 6), 10 (n = 8) and 15 mg/kg (n = 6) or its vehicle (n = 9) measured 1 hour after i.p. injection on CFA-contralateral hindpaw mechanical (**a**) and thermal heat (**b**) sensitivities. Data are expressed as mean ± SEM.

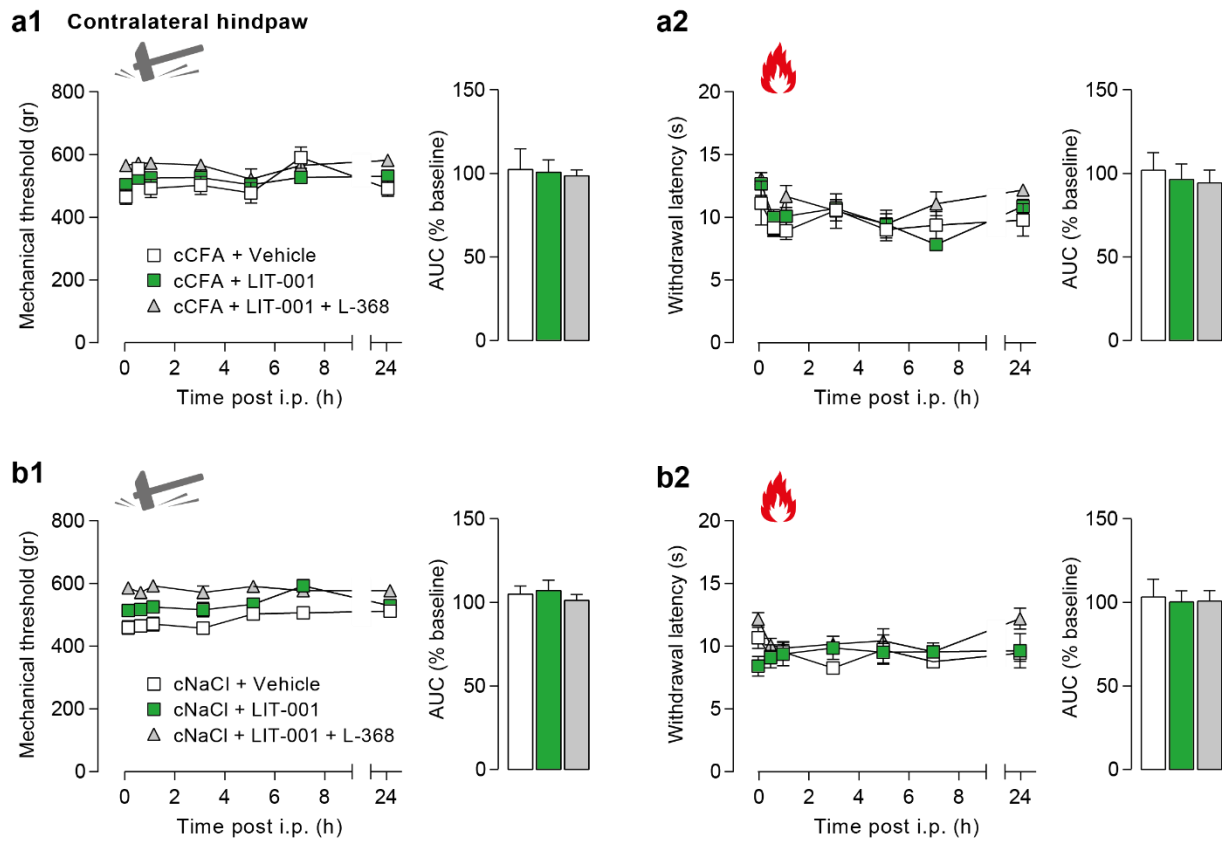

Figure S4

**Figure S4. Time-course of the analgesic properties of LIT-001 on CFA-induced inflammatory pain model – contralateral hindpaw.** (a) Left, time-course of the effects of i.p. LIT-001 10mg/kg ( $n = 7$ ), its vehicle ( $n = 5$ ) or co-injection with L-368,699 ( $n = 6$ ) on CFA-contralateral hindpaw mechanical (a1) and thermal heat (a2) sensitivities. Right, relative-to-baseline AUC (%) of the effects. (b) Left, time-course of the effects of i.p. LIT-001 10mg/kg ( $n = 7$ ), its vehicle ( $n = 5$ ) or co-injection with L-368,699 ( $n = 6$ ) on mechanical (b1) and thermal heat (b2) sensitivities of NaCl-contralateral hindpaw sensitivities. Right, relative-to-baseline AUC (%) of the effects. Data are expressed as mean  $\pm$  SEM. No statistical significance were detected using two-way ANOVA followed by Tukey's multiple comparisons test.

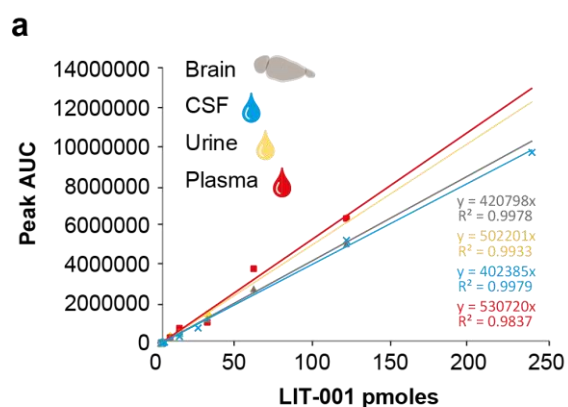

**b** HPLC gradient

| Time (min)     | 0  | 3  | 8  | 11 | 14 | 15 | 19 |
|----------------|----|----|----|----|----|----|----|
| B mobile phase | 10 | 10 | 30 | 98 | 98 | 10 | 10 |

**c** MS ionization, selection, fragmentation and identification parameters

| Compound | Polarity | Precursor (m/z) | Product (m/z) | Ion product type | Collision Energy (V) | RF Lens (V) |
|----------|----------|-----------------|---------------|------------------|----------------------|-------------|
| LIT-001  | Positive | 532.28          | 159.11        | Quantification   | 19.05                | 242.05      |
| LIT-001  | Positive | 532.28          | 185.07        | Qualification    | 19.00                | 242.05      |
| LIT-001  | Positive | 532.28          | 332.11        | Qualification    | 22.49                | 242.05      |

Figure S5

**Figure S5. LC-MS/MS dose response curves of increasing concentration of LIT-001 added to brain extracts, urine, plasma or water.** (a) Samples were treated as described in the material and method section. (b-c) **LC and MS conditions for the purification and the detection of LIT-001.** Mobile phase A corresponded to ACN 1% / H<sub>2</sub>O 98.9% / formic acid 0.1% (v/v/v), whereas mobile phase B was ACN 99.9 % / formic acid 0.1% (v/v).
